# Supplementary material for: Comparison of Conventional Molecular and Whole-Genome Sequencing Methods for Differentiating Salmonella enterica Serovar Schwarzengrund Isolates Obtained from Food and Animal Sources
Source: MDPI journal article supplement (doi:10.3390/microorganisms9102046), 2021-09-28
Supplement: s1 [file s1]

Table S1. Primers used in this study

| <b>Name</b>          | <b>Forward (5'→3')</b> | <b>Reverse (5'→3')</b>                       |
|----------------------|------------------------|----------------------------------------------|
| <i>aroC</i>          | GGCACCAGTATTGGCCTGCT   | CATATGCGCCACAATGTGTTG                        |
| <i>dnaN</i>          | CCGATTCTCGGTAACCTGCT   | CCATCCACCAGCTTCGAGGT                         |
| <i>hemD</i>          | GTGGCCTGGAGTTTCCACT    | GACCAATAGCCGACAGCGTAG                        |
| <i>hisD</i>          | GTCGGTCTGTATATTCCCGG   | GGTAATCGCATCCACCAAATC                        |
| <i>purE</i>          | CGCATTATTCCGGCGCGTGT   | CGCGGATCGGGATTTTCCAG                         |
| <i>sucA</i>          | AGCACCGAAGAGAAACGCTG   | GGTTGTTGATAACGATACGTAC                       |
| <i>thrA</i>          | ATCCCGGCCGATCACATGAT   | CTCCAGCAGCCCCTCTTTCAG                        |
| CRISPR1 <sup>a</sup> | GATGTAGTGCGGATAATGCT   | GGTTTCTTTTCTTCCTGTTG<br>GATGATATGGCAACAGGTTT |
| CRISPR2              | ACCAGCCATTACTGGTACAC   | ATTGTTGCGATTATGTTGGT                         |

<sup>a</sup>The two reverse primers of CRISPR1 were added together with the forward primer to amplify CRISPR1

Table S2. List and nucleotide sequence of CRISPR spacers

| Spacer No. | CRISPR1                          | CRISPR2                           | SS13                             |
|------------|----------------------------------|-----------------------------------|----------------------------------|
| 1          | TTTTAGAGGTGTACACTGTCGGCCTTTG     | TCGTAGTCTTCGGGTAGGCGTTTTTCATCCGG  | CGTTGCTGGCTATTCGAACTAACCTGATTGT  |
| 2          | CACCTTAGCGACGAAATTAACCGAGCTCAC   | TCTTTATCAGCTAACCATTTCCAGAACTCGTC  | GCCTCAGCATTGTCATAACCCACGCCTGGCA  |
| 3          | GCTTTGCCCCATGCGTCCAGATCTTCAACGGG | GCGAGCGTTTTGGGTGGCAGCAAAATCCCGAG  | CGGCTCGACCGGGAGCTTGCCGGCATCGTGGA |
| 4          | AGAAAATTATCACTGACGAGTGACAATAACTC | GTAACCTAATAAGGTCCTGGACATTAATTTTG  | GCAACTTCTTATATGTAAAAAACGTTATGAT  |
| 5          | GGAGGTGATCCGGGATTTAAACAAAATGATTA | AGTGCCGATGCGCGGTATCTGGGAATTCGC    | TCCGGGAAAGAACTCGCCTCGTCCAGCGTCA  |
| 6          | GGTTTACAGACCTCAATAAAAGACGGCAGGC  | ATAAAGGTCGGGGACGATATTGTTACCTGGTG  | CGGCGGCGGACGCCGCTCAGATAGCCAAAACC |
| 7          | GTCAGCGCCGGCGATTGGGCCGCCGATTTGT  | GGTGGAATCGCGCAAACTTTGTTTGTTCCG    | TATACAGGATTCTCACACTTTGGTTTGGTCGA |
| 8          | AATGCAATTTCTGACTCCCCTAACCTCAAGG  | GGGTACTGACAATAGTACAAATAAAAAAACG   | CGTTTTTTTTATTGTACTATTGTGAGTACCC  |
| 9          | AAGTACCGGCAAGTGTGGTAGCGAAGGTTATG | TCGACCAACCAAAAGTGTGAGAATCCTGTATA  | CGGAAACAAACAAGTTTTGCGCGATTCCACC  |
| 10         | GCGCTTGATCTCCGTTATCTAAGGGCCAATC  | GGTTTTGGCTATCTGAGCGCGTCCGCCGCCG   | CACCAGGTAACAGTATCGTCCCCGACCTTTAT |
| 11         | GCATCGGTGGCGCTGGCCAGTTCAAAAATACG | TGACGCTGGACGAGGCGAGTTCTTCCCGGA    | GCGAAATCCCCAGATACCGCGCATCGGCACT  |
| 12         | CTCAACGAACGCAGTATTTGATCGGATGTTT  | ATCATAACGGTTTTTTACATATAAGAAGTTGC  | CAAAATTAATGTCCAGGACCTTATTAAGTTAC |
| 13         |                                  | TCCACGATGCCGGCAAGCTCCCGGTCGAGCCG  | CTCGGGGATTTTGTGCCACCCAAAACGCTCGC |
| 14         |                                  | TGCCAGGCGTGGGGTTATGACAATGCTGAGGC  | GACGAGTTCTGGAATGGTTAGCTGATAAGA   |
| 15         |                                  | AACAATCAGGTTAGTTCGAATAGCCAGCAACG  | CCGGATGAAAACGCCTACCCGGAAGACTACGA |
| 16         |                                  | GGGTTTCGTTAGCGGGATCTGGTTGCTGCGCCA |                                  |
